1                    Implementation of Design of Experiments (DOE) for  
2                    Optimization of Feeding Strategy and Glyco-Engineering of  
3                    Trastuzumab Biosimilar

4                    **Rasoul Mahboudi, Sepideh Samavat, Amir Afrah, Mehdi Khorshidtalab, Arezou**  
5                    **Fadaei Tehran, Paria Motahari, Farnoush Jafari Iri Sofla\*, Shayan Maleknia**

6                    Biopharmaceutical Research Center, AryoGen Pharmed Inc., Alborz University of Medical Sciences,  
7                    Karaj, Iran

## 1 **Abstract**

2 Fed-batch cell culture is the most commonly used process for antibody production in  
3 biopharmaceutical industries. Basal media, feed, feeding strategy and glycan structures are always  
4 among the most important concerns during process development and optimization. In this study,  
5 first, a traditional screening study was performed to identify the top media/feed combinations by  
6 evaluating the cell culture performance including cell growth and protein titre. Optimization of the  
7 process was also performed using response surface methodology in order to find the most optimum  
8 feeding strategy and glucose set point regarding final titre of the recombinant monoclonal antibody  
9 being produced in Chinese hamster ovary cell line. The focus of this study is not only on titre, but  
10 also on product quality and comparability especially protein glycosylation. The prediction model  
11 of product titre as a function of feeding percentage and glucose set point was successfully applied  
12 for the second set of experiments that was performed for glycan improvement. Statistical design  
13 of experiments was applied to determine the most important factors and their effects on  
14 galactosylated and afucosylated glycans. Uridine, manganese, galactose and fucosyltransferase  
15 inhibitor were chosen to evaluate if their presence can affect glycans and to obtain their best  
16 combination for fed-batch culture supplementation. We determined that 2.5 % daily feeding  
17 combined with maintaining the glucose set point on  $2.5 \pm 0.2$  g/L could achieve final titre of  $2.5 \pm$   
18  $0.1$  g/L. Galactosylation of antibody was increased about 25% using  $MnCl_2$  and galactose while  
19 afucosylation was increased about 8% in presence of fucosyltransferase inhibitor. Galactose and  
20  $Mn^{2+}$  led to a shift from G0F to G1F and presence of Fucosyltransferase inhibitor caused to an  
21 increase in G0 compared to its absence. These results demonstrated that supplementation of culture  
22 with all these components can provide exact control of antibody galactosylation and fucosylation  
23 with minimal impact on culture characteristics and product quality attributes. Subsequently,  
24 validation experiments were also carried out in 5L STR bioreactors which showed that similar  
25 results could be achieved in bioreactors compared to shake flasks regarding both titre and quality.

26 **Keywords: Trastuzumab biosimilar, feeding strategy optimization, design of**  
27 **experiments (DOE), galactosylation, afucosylation**

## 28 **Abbreviations**

29 mAb: Monoclonal antibody; DOE: design of experiment; RSM: response surface  
30 methodology; CDC: complement dependent cytotoxicity; ADCC: antibody dependent cell  
31 cytotoxicity; CQA: critical quality attributes; Fc: fragment crystallizable; FTI: fucosyl transferase  
32 inhibitor; CHO: Chinese hamster ovary; HER2; human epidermal growth factor receptor 2; CCD:  
33 central composite design; ANOVA: analysis of variance; HPLC: high pressure liquid  
34 chromatography; STR : stirred tank reactor; DO: Dissolved oxygen; VCD: viable cell density;  
35 VCC: viable cell count.

## 36 **Introduction**

37 Monoclonal antibodies (mAbs) have become famous therapeutic agents in treatment of  
38 cancer, inflammatory, respiratory and infectious diseases. For mAb based therapies, typically, high  
39 doses in the range of hundreds of milligrams to a gram are needed per dose for achieving the  
40 favored therapeutic effect. In addition, high doses of antibodies are required over a long period of  
41 time, which requires large amounts of purified protein. Manufacturing capacity and cell line  
42 productivity are among most important factors that can affect the cost and efficacy of drug  
43 substance production (1). Therefore, increasing the productivity of antibody-producing cells in  
44 biopharmaceutical industries to meet the market demand is a real challenge (2).

45 Most monoclonal antibodies production platforms are based on firmly established fed-  
46 batch culture mode due to its ease of scale up and compatibility with large scale manufacturing of  
47 up to thousands of litres. The volumetric productivity of such cultures was typically improved  
48 from 50 mg/L/d in 1990s to about more than 200 mg/L/d at present (3). Basal and feed media are  
49 two components of fed-batch process that caused to cell growth and production, respectively by  
50 providing essential nutrients during the batch. For fed-batch mode, a sequential approach is  
51 conventionally used in which an optimal basal media is first chosen according to the growth  
52 characteristics of the cell line and quality attributes of the protein being produced. In next step a  
53 feed medium is also optimized regarding the type of feed and the feeding strategy in a way to  
54 provide the highest titre while maintaining the critical quality attributes in their acceptable range  
55 (4).

56 Traditional and statistical methods can be used for efficient selection of cell culture  
57 media/feeds combination and feeding strategy optimization. Traditional methods are costly and  
58 time consuming and do not seem favorable for biopharmaceutical companies which are looking  
59 forward to reduce time to market. Nowadays, approaches that combine high-throughput screening  
60 platforms with statistical design of experiment (DOE) such as factorial design and response surface  
61 methodology (RSM) are commonly used in biopharmaceutical companies to reduce the bioprocess  
62 development time and cost in Research and Development units (5). Factorial designs are used in  
63 order to find impact of several factors on a single response. However, RSM allows to achieve the  
64 most optimum response with selected factors.

65 Glycosylation is one of the most important post-translational modifications and critical  
66 quality attributes of therapeutic glycoproteins including monoclonal antibodies. These glycan  
67 chains on Fc region of mAbs are essential for their efficacy, stability and immune effector  
68 functions i.e. antibody-dependent cell-mediated cytotoxicity (ADCC) and complement-dependent  
69 cytotoxicity (CDC) (6). In particular, afucosylation and galactosylation play critical roles in ADCC  
70 and CDC, respectively (7). Additionally, during the development of a biosimilar drug product, it  
71 is essential to completely demonstrate similarity in both therapeutics regarding their critical quality  
72 attributes (CQAs). Similarity of the quality attributes between both innovator and biosimilar  
73 products should be proven before the new drugs entered to the market (8). Monoclonal antibody  
74 glycosylation can be modulated using various commercial products that were designed to enhance  
75 glycosylation. Among these additives, EX-CELL Glycosylation Adjust supplement (Gal+)  
76 (MilliporeSigma) has been shown effective results regarding enhanced glycosylation (9).

77 In this study, according to the interrelated behavior of feed and media on cell culture  
78 process parameters, combined optimization of basal and feed media was performed in order to  
79 develop a process that results in highest productivity of a CHO cell line producing an anti-HER2  
80 IgG1 monoclonal antibody (trastuzumab biosimilar). After finding the best basal/feed combination  
81 through conventional media/feed selection strategies, RSM methodology was used for finding the  
82 optimum level of feed and glucose set point for achieving the highest titre of the monoclonal  
83 antibody. Another important aim of this study was fine tuning of the culture composition through  
84 supplementation of nucleotide sugar precursors and glycosyltransferase enzymes cofactors or  
85 inhibitors to optimize galactosylated and afucosylated content of the antibody being produced. For

86 increasing antibodies with decreased amount of fucosylation i.e. afucosylation, a  
87 fucosyltransferase inhibitor 2F-peracetyl-fucose was used (10). In order to increase the level of  
88 galactosylated forms, three factors that were expected to potentially enhance intracellular  
89 galactosylation, namely galactose, uridine and  $Mn^{2+}$  were supplemented to the culture. Galactose  
90 and uridine are the main components for production of UDP-gal (a nucleotide sugar precursor that  
91 is added to the oligosaccharide moieties being present on Fc region of antibodies) while  $Mn^{2+}$  is  
92 the cofactor of galactosyltransferase enzyme that adds galactose residue to the glycan chains (11).  
93 The optimum concentration of all these supplements added to culture for improving glycosylation  
94 were fine-tuned by performing experiments that were designed through Full Factorial design of  
95 experiments. Finally, the models were further verified by performing a series of experiments in  
96 pre-determined optimum conditions predicted by the models.

## 97 **Materials and methods:**

### 98 **Basal media and feed selection:**

99 The CHO cell line producing trastuzumab biosimilar was kindly provided by AryoGen  
100 Pharmed Inc. (Alborz, Iran). This cell line was derived from CHO-S cells (Gibco, Catalog No.  
101 A11364). In order to find the best combination of basal media and feed that could result in optimum  
102 cell growth, and protein productivity, fed-batch cultures were performed by using commercially  
103 available basal/feed media combinations. Cell growth characteristics and protein titre were  
104 compared in six fed-batch culture conditions with different basal/feed combinations. Three  
105 chemically defined basal media were compared being: 1. CD1, 2. CD2 and 3. CD3 media, with  
106 media 1, 2 purchased from (Lonza, Verviers, Belgium) and medium 3 purchased from UGA  
107 Biopharma GmbH (UGA, Hennigsdorf, Germany). Two chemically defined feed systems were  
108 used in combination with three basal media mentioned above and compared. The feed systems  
109 used include: 1. FC from Life Technologies; and 2. FA and FB from GE Healthcare. Glucose  
110 concentrations of FC and FA was about 30 and 80 g/L, respectively. Media and feed solutions and  
111 supplements were all prepared according to manufacturer's protocols. All cultures contain 0.1%  
112 (v/v) Anti-clumping agent (Lonza, Verviers, Belgium).

113 One vial of research working cell bank was thawed in 500 ml shake flask containing 100  
114 ml pre-warmed media. Cells were sub-cultured every 3 days to initial cell density of  $0.6 \pm 0.05 \times 10^6$

115 cells/ml for at least 6 passages. Then fed-batch cultures were started with initial working volume  
116 of 100 ml in 500 ml shake flasks with the same initial cell density. Cells were incubated in an  
117 incubator with 5% CO<sub>2</sub> at 37 °C on orbital shaker with 100 rpm shaking speed and 30 mm orbital  
118 shaking diameter. In all culture conditions feeding was started on 2<sup>nd</sup> day of culture with a daily  
119 bolus addition according to Table 1. Batches were harvested on either day 15 or when viability  
120 dropped below 70%, which one occurred earlier.

121 **Table 1. Feeding protocols used in basal/feed selection experiments using three different**  
122 **basal media and two feeds**

| Basal media | Start feed (day) | Feed 1 (day, V/V %) | Feed 2 (day, V/V %) |
|-------------|------------------|---------------------|---------------------|
| CD1         | 2                | FA (2%), daily      | FB (0.2%), daily    |
| CD1         | 2                | FC (2%), daily      | —                   |
| CD2         | 2                | FA (2%), daily      | FB (0.2%), daily    |
| CD2         | 2                | FC (2%), daily      | —                   |
| CD3         | 2                | FA (2%), daily      | FB (0.2%), daily    |
| CD3         | 2                | FC (2%), daily      | —                   |

123

## 124 **Integrated medium and feeding strategy optimization**

125 In a typical fed-batch culture, the basal medium usually supports cell growth, while the  
126 feed medium contributes in increasing the productivity. After determining the top basal media/feed  
127 combination, the next development phase was started to improve the feeding strategy in order to  
128 fine tune the batch duration combined with final expression. To optimize the feeding strategy, two  
129 independent variables of feed percent (factor A) and glucose set point (factor B) were chosen to  
130 see their effect on protein titre (response). The effect of these two parameters on titre response was  
131 analyzed by standard response surface methodology (RSM) design called central composite design  
132 (CCD). RSM statistical method is suitable for optimization of the process parameters with a  
133 minimum number of experiments, as well as finding the quadratic and interaction effects between  
134 factors. Minitab version 17 (Minitab, Inc.) was used to design the experiments. Each factor was  
135 coded as -1 (low level), 0 (center point) and +1 (high level) and their uncoded values are  
136 represented in Table 2. These two factors were chosen since their influence on culture  
137 characteristics were known according to our previous knowledge. Central composite design with

138 a total of 13 experiments was used to obtain a quadratic model. The experimental run was  
139 randomized in order to omit the error and effect of the uncontrolled factors. The experiments being  
140 performed with center point values were repeated five times in order to have a good estimation of  
141 the experimental error. The model terms with *p-value* > 0.05 (if present) were removed in order to  
142 obtain a model with more adequacy.

143 **Table 2. The amount of different factors chosen for experiments in Central Composite design**

| Factors                 | Low level (-1) | Centre point (0) | High level (+1) |
|-------------------------|----------------|------------------|-----------------|
| Feed percent (%)        | 2              | 2.5              | 3               |
| Glucose set point (g/L) | 2              | 3                | 4               |

144

## 145 Glycan engineering experimental designs

146 Experimental data was generated according to a 2<sup>4</sup> factorial design. Full factorial design  
147 was chosen in order to include all possible combinations of factors at selected levels. The factors  
148 and their high and low limit ranges were MnCl<sub>2</sub> (Sigma, life science) (0-40 μM), galactose  
149 (Applichem, USA) (0-50 mM), Uridine (Sigma, life science) (0-4 mM), fucosyltransferase  
150 inhibitor 2F-peracetyl-Fucose (merck, calbiochem) (0-30 μM). Uridine was supplemented on days  
151 6 and 8 of the culture while, MnCl<sub>2</sub>, galactose and fucosyltransferase inhibitor (FTI) were added  
152 to basal media prior to inoculation of cells. CHO cells were cultured in 500 ml shake flasks with  
153 an effective volume of 100 ml, incubated at 37 °C with a 5% CO<sub>2</sub>, and agitated at 80 rpm. Each  
154 shake flask was inoculated with an approximate cell density of 0.6 ± 0.05×10<sup>6</sup> cells/ml. All  
155 experiments were performed with CD3 media and FA, FB feeds. Feeding strategy was set on 2.5%  
156 FA and 0.25% FB starting from day 2 till day 14 of the batch. Furthermore, glucose (Merck,  
157 Germany) was supplemented to keep on 2.5 ±0.2 g/L using 400 g/L glucose stock solution. Cell  
158 density, viability, pH and lactate were measured daily. Protein titre was also measured on days 3,  
159 5, 7, 9, 11, 13, and 15 of the batches using Protein A HPLC method. All the conditions were  
160 harvested on 15<sup>th</sup> day of the batch and were purified using MabSelect SuRe LX resin. Glycan  
161 analysis was performed and the data set was used for analyzing the factorial design in Minitab  
162 software. Three responses considered for this experimental design included: final titre (mg/L),  
163 Sum of oligosaccharides with galactose and without fucose. Total of 17 runs were designed using

164 general full factorial design considering one center point for each factor being tested. Factor  
165 coefficients and *p-values* were determined after analyzing the design using ANOVA.

## 166 **Cell density and viability determinations:**

167 Sampling of cultures were performed daily by taking 1 ml sample from each shake flask.  
168 Cell density and cell viability were determined by Trypan blue exclusion assay using a Neubauer  
169 cytometer. Glucose and lactate concentrations were measured daily with a BioProfile Analyzer  
170 400 (Nova Biomedical, Barcelona, Spain).

## 171 **Monoclonal antibody quantification**

172 The concentration of the monoclonal antibody in cell culture supernatant samples was  
173 determined by the Mab Pac protein A affinity column (Thermo scientific, CA, USA). Two buffer  
174 solutions were used for HPLC test. The equilibration buffer or mobile phase A (50 mM PBS, 150  
175 mM sodium chloride, (Merck, Germany) and 5% acetonitrile (Merck, Germany) pH 7.5. The  
176 mobile phase B was the same as mobile phase A buffer, with the only difference that pH of this  
177 solution was adjusted on 2.5 by Orthophosphoric acid. The elution gradient was programmed from  
178 0% to 100% of elution buffer B in approximately 5 min. The standard curve generated with the  
179 purified monoclonal IgG with predefined concentrations and the mAb quantification was  
180 performed based on this curve.

## 181 **Antibody purification**

182 Product quality assays were performed on samples purified by Protein A chromatography  
183 using MabSelect SuRe LX resin (GE Healthcare, Amersham, UK). The column was equilibrated  
184 in a citrate/sodium chloride buffer at pH 7. Cold, clarified bioreactor supernatant samples were  
185 loaded directly onto the column, washed with citrate/sodium chloride buffer at pH 7, eluted in  
186 citrate buffer at pH 3.5, and neutralized using a Tris buffer.

## 187 **Glycan analysis**

188 N-linked glycans were released from purified antibody samples by overnight incubation  
189 with N-Glycosidase F (Prozyme, GKE-5006B). The proteins were removed using LudgerClean  
190 glycan EB-10 cartridges (Ludger, Oxfordshire, UK). The oligosaccharides were labeled with the



191 fluorophore 2-aminobenzamide (2AB) using Ludger 2-AB (2-Aminobenzamide) glycan labeling  
192 kit (Cat No. LT-KAB-A2). The excess 2AB fluorophore was removed using LudgerClean S glycan  
193 cleanup cartridges. 2-AB Labeled glycans were eluted from the cartridges using ultra purified  
194 water (UPW) and were incubated in 5 °C for 24 h. The samples were then resuspended using 80%  
195 Acetonitrile solution and a sample was injected in to ACQUITY UPLC Glycan BEH Amide 1.7  
196  $\mu\text{m}$  (2.1 $\times$ 150 mm) Column equilibrated in Acetonitrile and eluted with a gradient of 100 mM  
197 Ammonium formate pH 4.5  $\pm$  0.1. The two mobile phases used were solvent A (0.1 M Ammonium  
198 formate pH 4.5  $\pm$  0.1) and solvent B (Acetonitrile). Elution of the sample was performed while  
199 Fluorescence was set at Ex = 330 nm and Em = 420 nm. The peaks that are present in the UPLC  
200 chromatogram of Herceptin biosimilar as well as innovator drug are as follows: G0FGN, G0, G0F,  
201 Man5, G1, G1F, G1F' and G2F. The amount of each structure is expressed as the percentage of  
202 total peak area. The amount of galactosylated structures is the sum of G1, G1F, G1F' and G2F  
203 peaks, while the afucosylated population is the sum of G0 and G1 peaks area. Man5 structure is  
204 the only structure that represents the amount of oligosaccharides with mannose.

## 205 **Validation and verification of the models**

206 Both experimental designs were verified by performing 5 runs in 5-L STR bioreactors in  
207 order to demonstrate the validity and predictive ability of both models obtained in this study. The  
208 culture process in bioreactors started by inoculation of  $0.6 \pm 0.05 \times 10^6$  cells/ml using the same  
209 media/feed used in small scale experiments. Because uridine addition resulted in low viability  
210 followed by low titre even in its lowest concentration of 2 mM, it was excluded from these set of  
211 experiments. Manganese, galactose and FTI were added to concentrations of 25  $\mu\text{M}$ , 40 mM and  
212 15  $\mu\text{M}$  of total culture volume, respectively. Agitation speed and DO set point were set on 190  
213 rpm and 50%, respectively. 2.6% FA and 0.26% FB were added daily from day 2 till day 14 of the  
214 batch. Glucose was also supplemented to the culture, daily in order to maintain its concentration  
215 about  $2.5 \pm 0.2$  g/L. All the cultures were stopped on 15<sup>th</sup> day of the batch.

## 216 Results

### 217 Media and feed selection

218 Fed batch culture is currently the most common industrial process for CHO cell culture.  
 219 The aim of fed-batch experiments was to determine the best combination of media/feed that results  
 220 in the highly optimized viable cell density (VCD), titre and culture longevity (12). Therefore, cell  
 221 density, viability, final titre and glucose concentration of all studied conditions were compared as  
 222 represented in Figure 1. The different media and feed combinations that were used in the fed-batch  
 223 cultures are depicted in Table 1.

224 CD3 media/FA and FB combination resulted in highest cell density and cell specific  
 225 productivity of  $\sim 16 \times 10^6$  cells/ml and 8.9 pg/cell/day, respectively. In all three basal media used in  
 226 this experiment, higher cell and antibody concentrations were obtained when FA and FB feeds  
 227 were used compared to FC. It has been previously shown that FA and FB are richer than FC both  
 228 in amino acids and glucose concentration (12). Among basal media used in this experiment, CD2  
 229 media resulted in the lowest cell density and final titre irrespective of the feeds that have been  
 230 used. Otherwise, CD3 media resulted in final titre of 1400 mg/L that was about 2.3 fold higher  
 231 than CD1, while there was not a significant difference between the cell densities of these two  
 232 media. Altogether, CD3 media combined with FA and FB feeds were chosen for subsequent  
 233 experiments on feeding strategy improvement.

234 **Fig 1. A) Cell density B) Viability, C) Final titre of the different fed-batch experiments**  
 235 **performed with different basal/feed combinations and D) Daily Glucose concentration of**  
 236 **cultures in different basal media supplemented with FA and FB feeds**

237 **Table 3. Characteristics of different fed-batch cultures regarding basal/feed media**  
 238 **combinations**

| Basal-media combinations/<br>characteristics of batches | CD1            |                | CD3            |                | CD2            |               |
|---------------------------------------------------------|----------------|----------------|----------------|----------------|----------------|---------------|
|                                                         | FA, FB         | FC             | FA, FB         | FC             | FA, FB         | FC            |
| Batch duration (day)                                    | 15             | 14             | 15             | 15             | 15             | 13            |
| Max cell density ( $\times 10^6$ cells/ml)              | 14.4 $\pm$ 0.4 | 11.2 $\pm$ 0.2 | 16.3 $\pm$ 0.4 | 13.3 $\pm$ 0.2 | 12.1 $\pm$ 0.3 | 8.7 $\pm$ 0.2 |
| Final titre (mg/L)                                      | 580 $\pm$ 26   | 394 $\pm$ 30   | 1426 $\pm$ 30  | 743 $\pm$ 40   | 316 $\pm$ 20   | 173 $\pm$ 15  |
| Cell specific productivity (Qp)<br>(pg/cell/day)        | 4.3 $\pm$ 0.1  | 4.0 $\pm$ 0.0  | 8.9 $\pm$ 0.0  | 6.1 $\pm$ 0.1  | 3.0 $\pm$ 0.1  | 2.2 $\pm$ 0.0 |

239

240 As can be seen in Figure 1.B in both CD1 and CD3 media fed with FA and FB feeds, the  
241 viability started to drop from day 10 of the batch. Considering daily glucose concentration of these  
242 conditions (Figure 1.D), it can be excluded that viability drop may started when glucose level  
243 became lower than 1 g/L. This phenomenon also happened when both media were fed with FC  
244 feed with the only difference that glucose depletion started earlier (about day 5).

245 According to the observed results, early viability drop, which coincided with glucose  
246 depletion, implies that 1 g/L glucose is a critical limitation concentration for this certain cell line.  
247 This result is in agreement with the report suggested using glucose feed in fed-batch process  
248 because cells at high density affected by glucose availability (13). In addition, since in these  
249 experiments a fixed 2% daily feed was added to the culture, this decreased glucose concentration  
250 may reflect the depletion of other nutrients especially amino acids in cultures. Moreover, at time  
251 of viability drop the concentrations of both lactate and ammonia were below their inhibition level  
252 reported in literature (14).

253 One of the most efficient feeding strategies is glucose-based feeding. This strategy  
254 although can help to maintain glucose levels during the batch but can be problematic due to  
255 accumulation or depletion of certain amino acids (12, 15, 16). Meanwhile once-daily feeding  
256 strategy cannot ensure that glucose level is being held near the set points pre-defined (13). Based  
257 on these results, the decision was made to use fixed feeding strategy while increasing the total  
258 amount of daily feed added to the culture. Simultaneously, glucose stock solution of 400 g/L was  
259 also used to bring glucose concentration to a level that prevents depletion before the next bolus  
260 feed. For this purpose, different glucose set points were also included in the experiments in order  
261 to investigate whether this cell line is sensitive to glucose levels or not.

## 262 **Integrated medium and feeding strategy optimization**

263 Improvement of cell growth and titre, requires media/feed combinations screening  
264 followed by feeding strategy optimization. After choosing CD3 as basal and FA & FB as feeds,  
265 RSM design was used to investigate the influence of different feed percentages and glucose set  
266 points on productivity of cells. For this purpose, different fixed amount of daily feeds were  
267 considered (Table 2). In addition, glucose was fed daily according to the glucose concentration at

268 the moment of feeding and the anticipated glucose uptake rate for the next 24 h. By this method  
269 the glucose was held within a pre-determined set point irrespective of the amount of feed added  
270 daily. Table 4 shows the final titre of the 13 generated experimental runs after execution.

271 The results showed that the max VCC (viable cell count) of  $16.5 \pm 0.5 \times 10^6$  cells/ml was  
272 achieved in all experiments. In conditions that Glucose concentration was maintained on 4 g/L,  
273 the highest lactate level (50-55 mM), lowest titre ( $950 \pm 250$  mg/L) and batch duration (12 days)  
274 were observed. It has been previously shown that by increasing the glucose concentration in fed  
275 batch mode cultures, higher lactate was produced which indirectly can cause inhibitory effects on  
276 growth and productivity (13, 15, 17).

277 When the glucose concentration of culture was decreased to both 2 and 3 g/L, the lactate  
278 consumption was observed after day 4 of the batch and lactate concentration was remained below  
279 10 mM for the rest of the batch. This lower lactate level lead to extended batch duration of 3-days  
280 and increased final titre of 2 to 2.5 fold compared to high glucose set point limit of 4 g/L.

281 In glucose set point of 2 g/L, the final titre increased about 1.4 fold when feed percentage  
282 increased from 2% to 2.5 and 3%. It highlights the effect of other nutrients increment in  
283 productivity of the culture. In addition, the results also revealed that when cultures are fed using  
284 lower amounts of feed (2% daily), increasing the glucose set point level could not significantly  
285 affect the final titre. The lower titre seems to be dependent more on other nutrients especially  
286 amino acids rather than glucose. When considering the effect of both feeding percentage and  
287 glucose set point, the results confirmed that they are in close relationship. The highest final titre  
288 of  $2.5 \pm 0.1$  g/L was observed in conditions that were supplemented with 2.5 % daily feed while  
289 their glucose set point was adjusted on 3 g/L.

290 The analysis of variance (ANOVA) results and the proposed model for the final mAb titre  
291 response is expressed as an empirical two order polynomial equation in terms of two variables (A:  
292 feed percent and B: glucose set point) in Table 5. The larger *F-value* and the smaller *p-value*,  
293 show more significant of the corresponding coefficient. The *F-value* of 51.38 indicates that the  
294 model is significant. Additionally, in this model feed percent and glucose set point (A and B) linear  
295 effects and quadratic effects ( $A^2$  and  $B^2$ ) are significant model terms due to their *P-value* which is  
296 lower than 0.05. Besides, interaction between feed percent and glucose set point has also  
297 significant effect on protein titre. In addition, the lack of fit *p-value* (0.065), also suggests that the  
298 model can be used as a prediction tool.

299 The analysis of adjusted and predicted coefficients of determination ( $R^2$ -values) which  
300 should be more than 60 indicates that titre response can be easily described with the model being  
301 created. (18) Adjusted  $R^2$  is an indicator of how well the experimental results fit the model while  
302 the predicted  $R^2$  indicates the prediction potential of the model regarding future experiments.  
303 Regression analysis shows that the model being built for titre response have adequately high  
304 adjusted and predicted  $R^2$ -values (95.45% and 83.19%, respectively).

305 **Table 4. Experimental conditions and the titre responses of RSM design.**

| Run No. | A: Feed Percent (%) | B: Glc set point (g/L) | Response: Titre (mg/L) |
|---------|---------------------|------------------------|------------------------|
| 1       | 1                   | 0                      | 2200                   |
| 2       | 0                   | 0                      | 2600                   |
| 3       | 1                   | -1                     | 2400                   |
| 4       | 0                   | 0                      | 2600                   |
| 5       | 1                   | 0                      | 2200                   |
| 6       | 0                   | 0                      | 2380                   |
| 7       | -1                  | 1                      | 800                    |
| 8       | 0                   | -1                     | 2300                   |
| 9       | 0                   | 1                      | 800                    |
| 10      | 0                   | 0                      | 2540                   |
| 11      | 1                   | 1                      | 700                    |
| 12      | -1                  | -1                     | 1600                   |
| 13      | 0                   | 0                      | 2500                   |

306 Factors are represented as their coded values.

307  
308 As can be seen in Table 4, increasing the feed percentage from 2.5% to 3% when glucose  
309 set point is on 2 g/L had no significant effect on titre. However in the same scenario when glucose  
310 set point was adjusted on 3 g/L, final titre was decreased. Lower titre may be due to the  
311 accumulation of specific amino acids which showed inhibitory effect on final productivity.

312 The results from this experiment shed light in the feeding strategy based on glucose set  
313 point for the fed-batch culture of the cell line used in this study. According to the variables  
314 coefficients of the model acquired from RSM, main (B) and quadratic ( $B^2$ ) effects of glucose set  
315 point are the most important parameters affecting the final titre. The other factors can be  
316 categorized with order of  $A^2$  (quadratic effect of feed percent), A (main effect of feed percent) and

317 A\*B (interaction effect of feed and glucose set point). This is mainly due to the decreased  
 318 productivity that has been occurred when increasing the glucose set point to 4 g/L in all conditions  
 319 irrespective of the amount of feed added. It can be concluded from contour plot (Fig. 2) that regions  
 320 of increased titre occurred in regions of sufficient amino acids feed (more than 2.5%) with glucose  
 321 set point of  $2.5 \pm 0.5$  g/L. Senger et al. were also reported that by increasing the glucose set point  
 322 to values more than 3 g/L especially when the cells were in lack of amino acids, the productivity  
 323 of r-tPA was decreased (19).

324 **Table 5. ANOVA results for the Model being built for Titre response in RSM statistical**  
 325 **design**

| Source                                                             | Adj SS  | df | Adj MS  | F-value | P-value |
|--------------------------------------------------------------------|---------|----|---------|---------|---------|
| Regression                                                         | 6285184 | 5  | 1257037 | 51.38   | 0.000   |
| A: Feed percent                                                    | 240000  | 1  | 240000  | 9.81    | 0.017   |
| B: Glc set point                                                   | 2666667 | 1  | 2666667 | 109.00  | 0.000   |
| A*A: Interaction                                                   | 401720  | 1  | 401720  | 16.42   | 0.005   |
| B*B: Interaction                                                   | 1686291 | 1  | 1686291 | 68.93   | 0.000   |
| A*B: Interaction                                                   | 202500  | 1  | 202500  | 8.28    | 0.024   |
| Error                                                              | 171247  | 7  | 24464   | -       | -       |
| Lack of Fit                                                        | 138127  | 3  | 46042   | 5.56    | 0.065   |
| Pure error                                                         | 33120   | 4  | 8280    | -       | -       |
| Total                                                              | 6456431 | 12 | -       | -       | -       |
| Titre = $2469 + 200 A - 666.7 B - 381.4 A*A - 781.4 B*B - 225 A*B$ |         |    |         |         |         |
| Adjusted R <sup>2</sup>                                            | 95.45%  |    |         |         |         |
| Predicted R <sup>2</sup>                                           | 83.19%  |    |         |         |         |

326

327 **Fig 2. Contour plot for titre of the cultures versus glucose set point and feed percentage**

## 328 **Experimental designs regarding glycan variation**

329 In order to improve the glycan structure of trastuzumab biosimilar monoclonal antibody  
 330 regarding its glycosimilarity with Herceptin originator drug, a set of experiments were designed  
 331 for increasing the galactosylated and afucosylated glycan structures. Sum of galactosylated and

332 afucosylated oligosaccharides in originator drug is usually between 32-35% and 5-9% of total  
333 glycan structures.

334 Galactosylation of Fc region in monoclonal antibodies can affect their complement  
335 dependent cytotoxicity (CDC) mechanism of action (20, 21). Galactosylation can drop over the  
336 course of culture due to reduced intracellular biosynthesis. Inside the cells Uridine triphosphate  
337 (UTP) and galactose-1-phosphate react to each other to produce UDP-galactose (UDP-gal) that is  
338 the building block of the galactose in oligosaccharide chains. The enzyme galactosyltransferase add  
339 UDP-gal to the sugar chain and Manganese ( $Mn^{2+}$ ) is the cofactor of this enzyme which helps it to  
340 improve its performance. Supplementation of Uridine, manganese and galactose can lead to  
341 increased level of UDP-gal that can cause to an increase in galactosylated glycan structures of  
342 monoclonal antibodies (11, 22).

343 Another important Fc-mediated immune effector function that plays the most important  
344 role in depleting tumor cells is called antibody-dependent cellular cytotoxicity (ADCC). It has  
345 been proved previously that the absence of core fucose on Fc N-glycan structures can lead to  
346 enhanced ADCC activity (23, 24). It has also been confirmed that apart from afucosylation,  
347 galactosylation levels could also influence ADCC activity; however, the role of afucosylation is  
348 more prominent. (25)

349 Different glycan engineering strategies were used for the purpose of improving the  
350 performance of therapeutic monoclonal antibodies through their effector functions (both ADCC  
351 and CDC) (26). Supplementation of the media with one of the components involved in  
352 galactosylation of monoclonal antibodies namely, uridine (U), manganese (M) and galactose (G)  
353 have provided remarkable results regarding increased protein oligosaccharide galactose content  
354 (27-29). Other researchers also demonstrated that adding a mixture of galactose, manganese  
355 chloride ( $MnCl_2$ ), and uridine to cell culture medium can alter the glycosylation of monoclonal  
356 antibodies (11, 22, 30-32).

357 Different technologies were also applied for reduction of core fucosylation in therapeutic  
358 monoclonal antibodies. These include: use of cell lines with inherent reduced capacity for  
359 incorporation of fucose (33) and generation of completely non-fucosylated antibodies in cells that  
360 were genetically engineered in their *FUT8* gene encoding the  $\alpha$ 1,6-fucosyltransferase (34). The



361 most straight forward approach that can easily be applied in biopharmaceutical companies is  
362 supplementation of media with Fucosyltransferase inhibitors such as 2F-peracetyl-fucose (10).

363 Given the possibilities discussed above, for improving glycosylation of antibody,  
364 combined effect of four factors that can be expected to potentially enhance simultaneously both  
365 galactosylation and afucosylation, namely U, M, G and FTI were considered. High and low limits  
366 were set for all these factors according to literature and our preliminary studies regarding this  
367 antibody. Full factorial design of experiments was used in order to find the most effective factors  
368 and also their optimum concentration. This method of DOE was used since it was important to  
369 study the impact of several factors on a response simultaneously (35).

370 The low and high limit of uridine concentration was set on 0 and 4 mM. These  
371 concentrations were chosen based on literature reports and subsequently preliminary experiments  
372 which showed that cell viability and final titre were remarkably dropped when 8 mM uridine was  
373 added to culture (data was not shown). Although 4 mM uridine was resulted in lower titre  
374 compared to the conditions without this supplement, but in order to check the interaction effect  
375 (mainly synergistic effect) of this supplement with manganese and galactose this concentration  
376 was considered as the high level in our experiments. Gramer et al. reported that galactose was  
377 started to accumulate in culture when it was more than 40 mM (in condition with 8X concentration  
378 of UMG). They also confirmed cultures supplemented with 8 mM uridine, 16  $\mu\text{M}$   $\text{Mn}^{2+}$  and 40  
379 mM galactose reached to a plateau in their galactosylation level (11). Based on their report and  
380 according to our prior knowledge, galactose higher limit was set to 50 mM in our experimental  
381 design. The high limit of  $\text{Mn}^{2+}$  concentration was chosen according to the patent No.  
382 US20170107551A1 in which they reported that 40  $\mu\text{M}$  manganese concentration resulted in the  
383 most optimum galactosylated level in shake flasks (36). David T.Ho et al. results represented that  
384 using 100  $\mu\text{M}$  FTI resulted in 67% decrease in afucosylation level (10). Besides, in preliminary  
385 experiments with FTI supplement, it was observed that adding 50  $\mu\text{M}$  FTI in culture resulted in a  
386 decreased fucosylation level from  $97 \pm 1\%$  (in absence of FTI) to  $85 \pm 1\%$ . According to this  
387 experiment, the decision was made to consider 0 and 30  $\mu\text{M}$  FTI concentrations as the lowest and  
388 highest level for FTI factor for finding its optimum concentration.

389 When galactose was added to culture with concentration of 50 mM it could increase the  
390 galactosylated glycans about 8% in absence of both  $\text{Mn}^{2+}$  and Uridine supplements (Fig 3). About



391 11% increase in galactosylation level was also reported when 20 mM galactose was added to CHO  
392 fed-batch cultures (37).

393 Addition of 4 mM uridine to the culture containing 50 mM galactose couldn't further  
394 increase the level of galactosylation. Furthermore in presence of 4 mM uridine lower cell density  
395 was observed followed by lower final titre of  $1.5 \pm 0.2$  g/L compared to the titre of about 2.5 g/L  
396 in absence of uridine. It was in contrast to Gramer et al. reports in which they showed that addition  
397 of uridine up to 16 mM had no effect on productivity reduction (11). Our results indicated that  
398 addition of  $Mn^{2+}$  led to increased protein oligosaccharide galactose content from  $22 \pm 0.5\%$  (in  
399 absence of  $Mn^{2+}$  and presence of galactose) to  $30 \pm 2\%$  (in absence of galactose) and to  $40 \pm 2\%$  (in  
400 presence of either 25 or 50 mM galactose).

401 The overall increase in galactosylation was primarily due to a drop in G0F content with a  
402 related increase in G1F and G1F' and secondarily to a slight increase in G2F (Table 7). As can be  
403 seen in Table 5 the G0F content of the monoclonal antibody was about 70% in absence of  $Mn^{2+}$   
404 and decreased to 48% and 58% in presence of 20 and 40  $\mu M Mn^{2+}$ , respectively. G1F glycan  
405 structures was increased from 9% ( in absence of  $Mn^{2+}$  and galactose) to  $14.5 \pm 0.5\%$  ( in absence  
406 of  $Mn^{2+}$  and presence of galactose) and to  $25 \pm 1\%$  ( in presence of both  $Mn^{2+}$  and galactose). The  
407 trend of increase in G1F' structures was exactly similar to the G1F glycans with the only difference  
408 that the increase in these oligosaccharides were happened with lower slope. This is in total  
409 agreement with the results expained by Roger Anderson et al., in which they claimed that  
410 galactosylation of glycan structures preferentially occures more on the glycans  $\alpha 1,6$  than  $\alpha 1,3$  arm  
411 (38). G2F glycans were only increased about  $3 \pm 0.5\%$  when both  $Mn^{2+}$  and galactose were  
412 supplemented in cultures while there was no change in these glycans when either  $Mn^{2+}$  or galactose  
413 were present.

414 The equations of the models and the main effect plots (derived in Minitab) for all three  
415 responses are shown in Table 6 and Figure 4, respectively. These models were fitted by omitting  
416 insignificant terms based on their *p-values* ( $>0.05$ ). All three responses have linear relationships  
417 with their effective factors. As represented in Table 6, the models gained from factorial design  
418 analysis also revealed that the percentage of galactosylated glycans was mostly dependent on  
419  $MnCl_2$  followed by galactose concentrations with coefficients of 0.37 and 0.14, respectively. The  
420 results obtained were completely in agreement with Crowell et al. study in which they represented

421 that addition of  $Mn^{2+}$  alone can lead to increased protein oligosaccharide content (29). The negative  
422 coefficient of uridine concentration in titre response also revealed that its presence in culture  
423 negatively affect the productivity of the cell line used in this study.

424 **Fig 3. Titre and galactosylation level of different experimental runs with different**  
425 **concentrations of UMG. The data are represented as mean  $\pm$  SD.**

426 In the context of afucosylation, our results confirmed that using FTI as a fucosyltransferase  
427 inhibitor we could increase the afucosylated glycan structures of trastuzumab biosimilar about 8%.  
428 This increase in afucosylated structures was similar in both FTI concentrations (15 and 30  $\mu$ M)  
429 that were used in our experiments. Interestingly, it can also be concluded from the results that the  
430 increase in afucosylated structures happened irrespective of the presence of other three  
431 supplements used for galactosylation improvement. Furthermore, supplementation of the  
432 inhibitor to the culture had not influenced culture parameters in terms of viable cell density and  
433 productivity, exactly the same as David T.Ho results (10). Figure 4 also confirmed that FTI  
434 supplement is the only factor that is responsible for increasing the afucosylated glycans level. The  
435 main increase in afucosylated glycan content was due to the increase in G0 content of  
436 oligosaccharides being present in trastuzumab biosimilar drug which was increased from about  $2 \pm$   
437  $1\%$  in conditions without FTI to  $8 \pm 1\%$  and  $9.5 \pm 1\%$  in presence of 15 and 30  $\mu$ M FTI,  
438 respectively.

439 It also should be noted that afucosylation was slightly increased from  $1.8 \pm 0.2\%$  (in absence  
440 of uridine) to  $3.5 \pm 1\%$  ( in presence of 4 mM uridine). Nevertheless, in presence of uridine even  
441 in its lowest amount (2 mM), lower titre was observed compared to absence of this supplement.  
442 Gramer et al. also reported that the fucosylation of their antibody encountered with a slight drop  
443 from 97% to 94% in 0 and 20 mM uridine (11). The main effect plot (Fig. 4A) also shows that the  
444 most significant of the investigated parameters which affects titre was uridine concentration. In  
445 addition negative coefficient of uridine concentration in titre response equation indicates that it  
446 negatively affects titre. Due to this negative impact on culture behaviour and according to its  
447 negligible effect on afucosylation glycan level, the decision was made not to supplement this factor  
448 in future cultures. The supplementation of U, M and G supplements neither affected Man 5 nor  
449 fucosylated glycan content. Besides, other quality attributes of the protein have not been affected  
450 by supplementing the fed-batch cultures with all these four supplements.

451 **Fig 4. Main effects plot of titre, with galactose % and W/O Fucose% responses Vs, uridine,**  
 452 **MnCl<sub>2</sub>, galactose and FTI factors in factorial design analysis.**

453 **Table 6. Linear regression models obtained from factorial design statistical analysis**

| Response           | Equation                                         | R-sq (adj) | R-sq (pred) |
|--------------------|--------------------------------------------------|------------|-------------|
| Titre (mg/L)       | = 2.47- 0.25 Uridine                             | 98.6 %     | 98.37%      |
| With Galactose (%) | = 16.97+ 0.37 MnCl <sub>2</sub> + 0.14 Galactose | 81.52%     | 79.81%      |
| Without Fucose (%) | = 2.67+ 0.31 FTI                                 | 92.55%     | 91.14%      |

454

455 **Table 7. Detail of glycan structure percentage in different concentrations of uridine,**  
 456 **manganese and galactose in absence and presence of FTI**

| U (mM), M (μM) and G (mM) | FTI (μM) | G0   | G0F  | G1   | G1'  | G1F  | G1F' | G2F  | Galactosylation (%) | Afucosylation (%) |
|---------------------------|----------|------|------|------|------|------|------|------|---------------------|-------------------|
| 4, 0, 50                  | 0        | 3.3  | 67.2 | 0.55 | 0.4  | 14.7 | 4.3  | 3    | 23                  | 4.3               |
|                           | 30       | 10.6 | 64.4 | 0.9  | 0.5  | 13   | 3.8  | 2.8  | 21                  | 12                |
| 4, 40, 50                 | 0        | 1.9  | 55.5 | 0.8  | 0.7  | 25.3 | 7.7  | 4.5  | 39                  | 3.4               |
|                           | 30       | 11.6 | 47.4 | 0.86 | 0.5  | 22.9 | 8.3  | 4.4  | 37                  | 13                |
| 4, 0, 0                   | 0        | 1.6  | 72.9 | 0.5  | 0.4  | 13.1 | 3    | 2    | 19                  | 2.5               |
|                           | 30       | 12.6 | 65.3 | 1.7  | 0.7  | 11.5 | 4.1  | 2    | 20                  | 15                |
| 4, 40, 0                  | 0        | 2.7  | 61.9 | 0.2  | 0.03 | 23.6 | 5    | 1.2  | 30                  | 3                 |
|                           | 30       | 8.7  | 53.6 | 0.86 | 0.44 | 18   | 8.3  | 4.37 | 32                  | 10                |
| 2, 20, 25                 | 15       | 8.1  | 48.7 | 1.3  | 0.04 | 26   | 8    | 4.6  | 40                  | 9.5               |
| 0, 0, 50                  | 0        | 1.1  | 69   | 0.5  | 0.4  | 15.2 | 4.3  | 3    | 23                  | 2                 |
|                           | 30       | 10.6 | 63.4 | 0.9  | 0.5  | 13.8 | 4    | 2.8  | 22                  | 12                |
| 0, 40, 0                  | 0        | 1.2  | 63.4 | 0.2  | 0.03 | 23.6 | 5    | 1.2  | 30                  | 1.5               |
|                           | 30       | 9.8  | 57   | 0.8  | 0.4  | 18.5 | 5.8  | 3.5  | 29                  | 11                |
| 0, 40, 50                 | 0        | 1.2  | 52.4 | 0.46 | 0.02 | 26   | 9.5  | 5.96 | 42                  | 1.7               |
|                           | 30       | 9.7  | 47   | 0.86 | 0.44 | 24.1 | 8.5  | 5    | 39                  | 11                |
| 0, 0, 0                   | 0        | 1.7  | 77.3 | 0.18 | 0.06 | 9    | 3.3  | 1.41 | 14                  | 2                 |
|                           | 30       | 10.9 | 68.5 | 1.54 | 0.04 | 8    | 3.9  | 1.5  | 15                  | 12.5              |

457 G0F-GN and Man5 structures do not included in the table since their percentage was less than 4% and 3%,  
 458 respectively in different experiments.

459 Our results pointed out that control on the amount of both galactosylation and afucosylation  
 460 content of monoclonal antibodies being produced in CHO cell lines can be achieved by  
 461 supplementing the culture simultaneously with UMG and FTI. Taken together, these experiments  
 462 suggests that the highly optimized concentration of Mn<sup>2+</sup>, galactose and FTI for simultaneously  
 463 controlling both the galactosylation and afucosylation level of glycan structures were 20 μM and  
 464 25 mM, and 15 μM, respectively. Furthermore, supplementing the cultures with all these

465 glycosylation modulators neither affect the culture performance and productivity nor other quality  
466 attributes of the protein regarding its comparability with originator drug.

## 467 **Verification and validation of models**

468 For demonstrating the predictive ability of both RSM and factorial designs obtained  
469 respectively for feeding strategy and glycan improvement, a set of experiments were performed  
470 with the optimum level of the factors acquired from response optimizer of Minitab software. The  
471 feeding strategy and supplementation patterns used in verification experiments are represented in  
472 Table 8. The verification process generated experimental results close to the predicted response  
473 ( $p$ -value < 0.05) as represented in Table 9. Our optimized feeding strategy combined with glucose,  
474 galactose, MnCl<sub>2</sub> and FTI supplementation resulted in mean expression of 2510 ± 65 mg/L.  
475 Simultaneously the level of galactosylation and afucosylation were also increased to 32.5 ± 0.6 %  
476 and 7.3 ± 0.5 %, respectively which were completely comparable to Herceptin originator drug.  
477 The good agreement between the experimental and predicted results verifies the validity of the  
478 models.

479 **Table 8. Optimal processing conditions used for model verification in 5-Lscale bioreactors**

|                                |                                                                                      |
|--------------------------------|--------------------------------------------------------------------------------------|
| <b>Feeding strategy</b>        | 2.6 % daily FA+ 0.26% FB daily. Start feed: day 2                                    |
| <b>Glucose set point (g/L)</b> | Glucose was supplemented to culture in a way to maintain glucose above 2.5 ± 0.2 g/L |
| <b>Galactose (mM)</b>          | 40                                                                                   |
| <b>MnCl<sub>2</sub> (μM)</b>   | 25                                                                                   |
| <b>FTI (μM)</b>                | 15                                                                                   |

480

481 **Table 9. Comparison of the predicted versus experimental results obtained in model**  
482 **verification experiments**

|                                      | <b>Titre (mg/L)</b> | <b>With galactose %</b> | <b>Without Fucose %</b> |
|--------------------------------------|---------------------|-------------------------|-------------------------|
| Experimental value of 5 L scale runs | 2510 ± 65.19        | 32.5 ± 0.62             | 7.37 ± 0.57             |
| Predicted value                      | 2600                | 32                      | 7.44                    |
| Significant? (Y/N)                   | N*                  | N                       | N                       |

483 N: not significant

## 484 **Conclusion**

485           The focus of this study is not only on improving the process titre but also on product quality  
486 and comparability. The aim of this study regarding process yield was to investigate the effects of  
487 different basal media and feeds on cell culture performance and mAb production. The highest mAb  
488 titre (1.4 g/L) was obtained with CD3 basal medium and FA and FB feeds. In next phase of  
489 development, the feeding strategy was optimized through high throughput response surface  
490 methodology which resulted in a fixed feeding strategy on a daily basis while controlling the  
491 glucose level of culture (more than 2 g/L on the next day of culture). By operating with a feed and  
492 glucose control, higher titre of about  $2.5 \pm 0.1$  g/L were achieved. The feeding strategy that was  
493 developed was beneficial to our company since it was easy to implement this strategy both in lab-  
494 scale and in manufacturing. Another goal of this study regarding product quality was achieved  
495 through supplementation of culture with glycan structures precursors or glycosyltransferase  
496 enzymes regulators. Although the glycan structures regulation can be achieved using commercial  
497 available supplements such as EX-CELL Glycosylation Adjust which enables the desired N-linked  
498 glycosylation, combination of supplements have been chosen to be investigated that can not only  
499 modulate glycan structures but also can be cost beneficial when used as a cocktail in large scale  
500 production. To achieve this, full factorial design of experiments were included to find the effect of  
501 UMG and FTI supplements on titre, galactosylation, and afucosylation content of trastuzumab  
502 biosimilar drug. Among supplements used, the best combination achieved was 25  $\mu$ M  $Mn^{2+}$ , 40  
503 mM galactose and 15  $\mu$ M FTI. These supplements resulted in galactosylation level of more than  
504 30% and afucosylation of 5-9% which is completely similar to its originator. To our knowledge,  
505 this study is the first report regarding the application of both afucosylation and galactosylation  
506 improving supplements for glycan engineering of pharmaceutical proteins. This work provided a  
507 methodology that can be used for media and process development studies. Future studies might  
508 involve adding these supplements at different time points during culture to determine and specify  
509 the best time for their supplementation.

## 510 Acknowledgements

511 This work was supported by Biopharmaceutical Research Center of AryoGen pharmed Inc.  
512 and was performed under ethical supervision of Alborz University of Medical Sciences with ethics  
513 code of IR.ABZUMS.REC.1396.042 and IR.ABZUMS.REC.1397.036.

## 514 References

- 515 1. Li F, Vijayasankaran N, Shen AY, Kiss R, Amanullah A. Cell culture processes for monoclonal antibody  
516 production. *mAbs*. 2010;2(5):466-79.
- 517 2. Li FX, editor *Current Therapeutic Antibody Production and Process Optimization*2006.
- 518 3. Huang YM, Hu W, Rustandi E, Chang K, Yusuf-Makagiansar H, Ryll T. Maximizing productivity of CHO  
519 cell-based fed-batch culture using chemically defined media conditions and typical manufacturing  
520 equipment. *Biotechnology progress*. 2010;26(5):1400-10.
- 521 4. Xiao Z, Sabourin M, Piras G, Gorfien SF. Screening and optimization of chemically defined media  
522 and feeds with integrated and statistical approaches. *Methods in molecular biology (Clifton, NJ)*.  
523 2014;1104:117-35.
- 524 5. Jiang Z, Droms K, Geng Z, Casnocha S, Xiao Z, Gorfien S, et al. Fed-batch cell culture process  
525 optimization: A rationally integrated approach2012. 40-5 p.
- 526 6. Reusch D, Tejada ML. Fc glycans of therapeutic antibodies as critical quality attributes. *Glycobiology*.  
527 2015;25(12):1325-34.
- 528 7. Sha S, Agarabi C, Brorson K, Lee DY, Yoon S. N-Glycosylation Design and Control of Therapeutic  
529 Monoclonal Antibodies. *Trends in biotechnology*. 2016;34(10):835-46.
- 530 8. Borza B, Szigeti M, Szekrenyes A, Hajba L, Guttman A. Glycosimilarity assessment of biotherapeutics  
531 1: Quantitative comparison of the N-glycosylation of the innovator and a biosimilar version of  
532 etanercept. *J Pharm Biomed Anal*. 2018;153:182-5.
- 533 9. Anderson R, Hock L, Yao R, Ozturk SS. Enhanced Galactosylation of Monoclonal Antibodies.  
534 *BioProcess International*. 2018;16:3.
- 535 10. Ho DT, Park JF, Ho DE, Nunez B, Bang J, Ni JH-T. Fucosylation of a Therapeutic Antibody: Effects on  
536 Antibody-Dependent, Cell-Mediated Cytotoxicity (ADCC) Potency and Efficacy. *Benefits*. 2016.
- 537 11. Gramer MJ, Eckblad JJ, Donahue R, Brown J, Shultz C, Vickerman K, et al. Modulation of antibody  
538 galactosylation through feeding of uridine, manganese chloride, and galactose. *Biotechnology and  
539 bioengineering*. 2011;108(7):1591-602.
- 540 12. Pan X, Streefland M, Dalm C, Wijffels RH, Martens DE. Selection of chemically defined media for  
541 CHO cell fed-batch culture processes. *Cytotechnology*. 2017;69(1):39-56.
- 542 13. Lu S, Sun X, Zhang Y. Insight into metabolism of CHO cells at low glucose concentration on the basis  
543 of the determination of intracellular metabolites. *Process Biochemistry*. 2005;40(5):1917-21.
- 544 14. Xing Z, Li Z, Chow V, Lee SS. Identifying inhibitory threshold values of repressing metabolites in CHO  
545 cell culture using multivariate analysis methods. *Biotechnology progress*. 2008;24(3):675-83.
- 546 15. Khattak SF, Xing Z, Kenty B, Koyrakh I, Li ZJ. Feed development for fed-batch CHO production  
547 process by semisteady state analysis. *Biotechnology progress*. 2010;26(3):797-804.
- 548 16. Ma N, Ellet J, Okediadi C, Hermes P, McCormick E, Casnocha S. A single nutrient feed supports both  
549 chemically defined NSO and CHO fed-batch processes: Improved productivity and lactate  
550 metabolism. *Biotechnology progress*. 2009;25(5):1353-63.



- 551 17. Altamirano C, Illanes A, Becerra S, Cairo JJ, Godia F. Considerations on the lactate consumption by  
552 CHO cells in the presence of galactose. *J Biotechnol.* 2006;125(4):547-56.
- 553 18. Strnad J, Brinc M, Spudic V, Jelnikar N, Mirnik L, Carman B, et al. Optimization of cultivation  
554 conditions in spin tubes for Chinese hamster ovary cells producing erythropoietin and the  
555 comparison of glycosylation patterns in different cultivation vessels. *Biotechnology progress.*  
556 2010;26(3):653-63.
- 557 19. Senger RS, Karim MN. Optimization of fed-batch parameters and harvest time of CHO cell cultures  
558 for a glycosylated product with multiple mechanisms of inactivation. *Biotechnol Bioeng.*  
559 2007;98(2):378-90.
- 560 20. Kiyoshi M, Caaveiro JMM, Tada M, Tamura H, Tanaka T, Terao Y, et al. Assessing the Heterogeneity  
561 of the Fc-Glycan of a Therapeutic Antibody Using an engineered FcγReceptor IIIa-Immobilized  
562 Column. *Scientific Reports.* 2018;8(1):3955.
- 563 21. Raju T, E Jordan R. Galactosylation variations in marketed therapeutic antibodies2012. 385-91 p.
- 564 22. Hills AE, Patel A, Boyd P, James DC. Metabolic control of recombinant monoclonal antibody  
565 N-glycosylation in GS-NS0 cells. *Biotechnology and bioengineering.* 2001;75(2):239-51.
- 566 23. Pereira NA, Chan KF, Lin PC, Song Z. The “less-is-more” in therapeutic antibodies: Afucosylated anti-  
567 cancer antibodies with enhanced antibody-dependent cellular cytotoxicity. *mAbs.* 2018;10(5):693-  
568 711.
- 569 24. Luo C, Chen S, Xu N, Wang C, Sai Wb, Zhao W, et al. Glycoengineering of pertuzumab and its impact  
570 on the pharmacokinetic/pharmacodynamic properties. *Scientific Reports.* 2017;7:46347.
- 571 25. Thomann M, Reckermann K, Reusch D, Prasser J, Tejada ML. Fc-galactosylation modulates antibody-  
572 dependent cellular cytotoxicity of therapeutic antibodies. *Molecular immunology.* 2016;73:69-75.
- 573 26. Kellner C, Otte A, Cappuzzello E, Klausz K, Peipp M. Modulating Cytotoxic Effector Functions by Fc  
574 Engineering to Improve Cancer Therapy. *Transfusion Medicine and Hemotherapy.* 2017;44(5):327-  
575 36.
- 576 27. Andersen D. Cell culture effects on the glycosylation of therapeutic proteins. *Bioprocess*  
577 *International IBC Life Sciences, Boston.* 2004.
- 578 28. Ryll T. Mammalian cell culture process for producing glycoproteins. *Google Patents;* 2003.
- 579 29. Crowell CK, Grampp GE, Rogers GN, Miller J, Scheinman RI. Amino acid and manganese  
580 supplementation modulates the glycosylation state of erythropoietin in a CHO culture system.  
581 *Biotechnol Bioeng.* 2007;96(3):538-49.
- 582 30. Liu B, Spearman M, Doering J, Lattová E, Perreault H, Butler M. The availability of glucose to CHO  
583 cells affects the intracellular lipid-linked oligosaccharide distribution, site occupancy and the N-  
584 glycosylation profile of a monoclonal antibody. *Journal of biotechnology.* 2014;170:17-27.
- 585 31. Grainger RK, James DC. CHO cell line specific prediction and control of recombinant monoclonal  
586 antibody N-glycosylation. *Biotechnology and bioengineering.* 2013;110(11):2970-83.
- 587 32. St. Amand MM, Radhakrishnan D, Robinson AS, Ogunnaike BA. Identification of manipulated  
588 variables for a glycosylation control strategy. *Biotechnology and bioengineering.*  
589 2014;111(10):1957-70.
- 590 33. Patnaik SK, Stanley P. Lectin-resistant CHO glycosylation mutants. *Methods in enzymology.*  
591 2006;416:159-82.
- 592 34. Yamane-Ohnuki N, Kinoshita S, Inoue-Urakubo M, Kusunoki M, Iida S, Nakano R, et al. Establishment  
593 of FUT8 knockout Chinese hamster ovary cells: An ideal host cell line for producing completely  
594 defucosylated antibodies with enhanced antibody-dependent cellular cytotoxicity. *Biotechnology*  
595 *and bioengineering.* 2004;87(5):614-22.
- 596 35. Vasilev N, Gromping U, Lipperts A, Raven N, Fischer R, Schillberg S. Optimization of BY-2 cell  
597 suspension culture medium for the production of a human antibody using a combination of

- 598 fractional factorial designs and the response surface method. *Plant biotechnology journal*.  
599 2013;11(7):867-74.
- 600 36. Chang JY, Hwang EH, Kim YJ, Kim WK, Park SK, Park JY, et al. Method for preparing antibody through  
601 regulation of sugar content of antibody. Google Patents; 2017.
- 602 37. Kildegaard HF, Fan Y, Sen JW, Larsen B, Andersen MR. Glycoprofiling effects of media additives on  
603 IgG produced by CHO cells in fed-batch bioreactors. *Biotechnol Bioeng*. 2016;113(2):359-66.
- 604 38. Anderson R, Hock L, Yao R. Enhanced Galactosylation of Monoclonal Antibodies: Using Medium  
605 Supplements and Precursors of UDP-Galactose, Part 2.
- 606



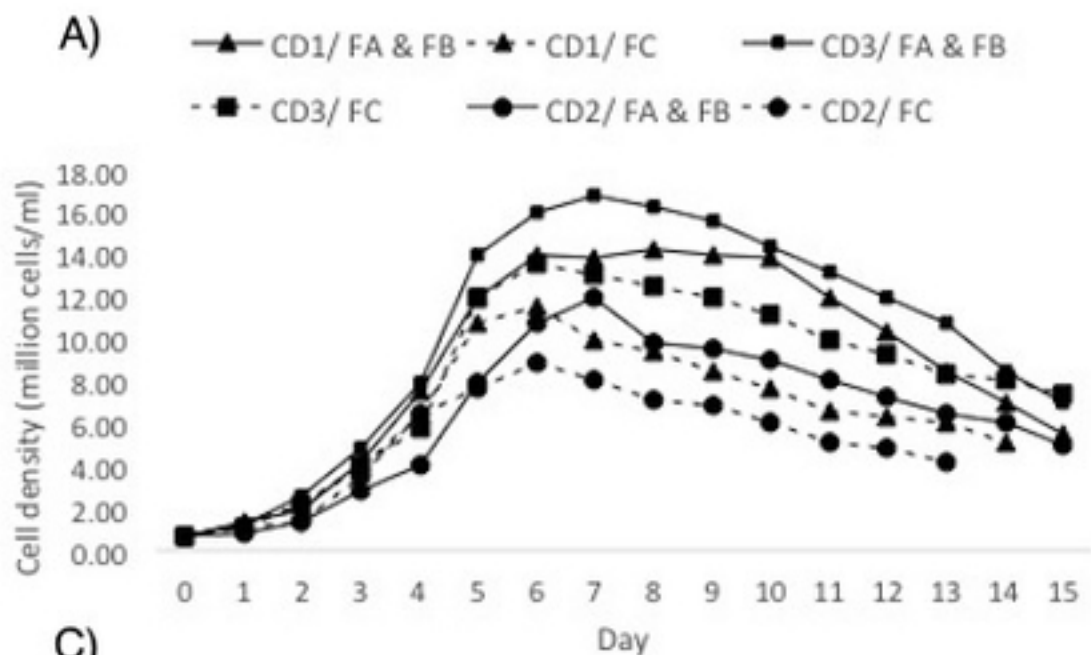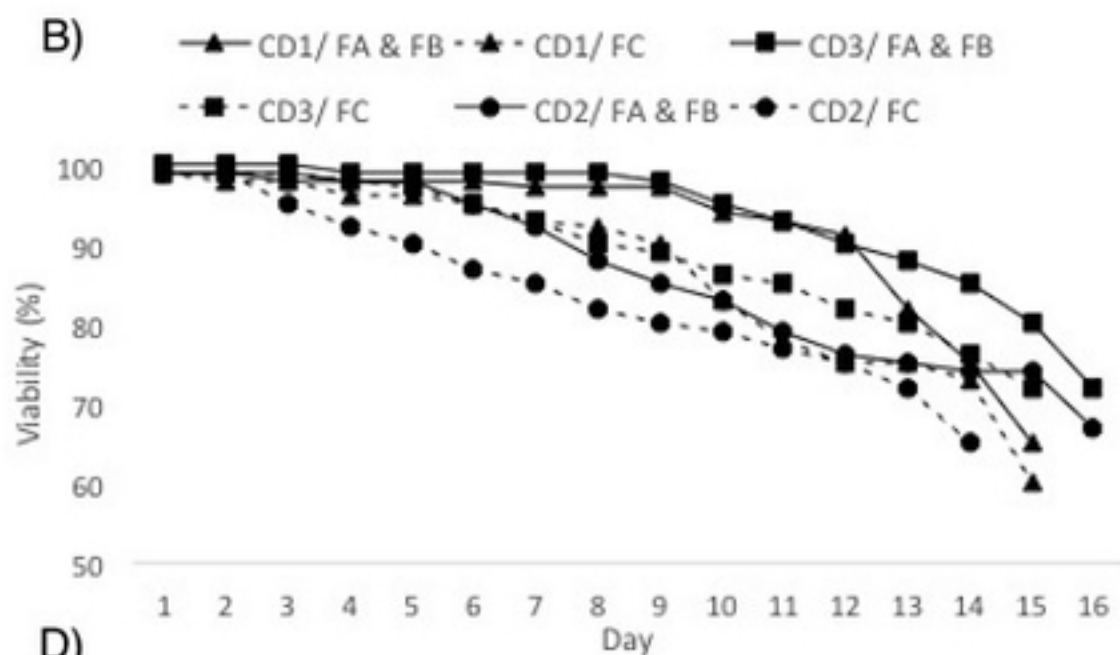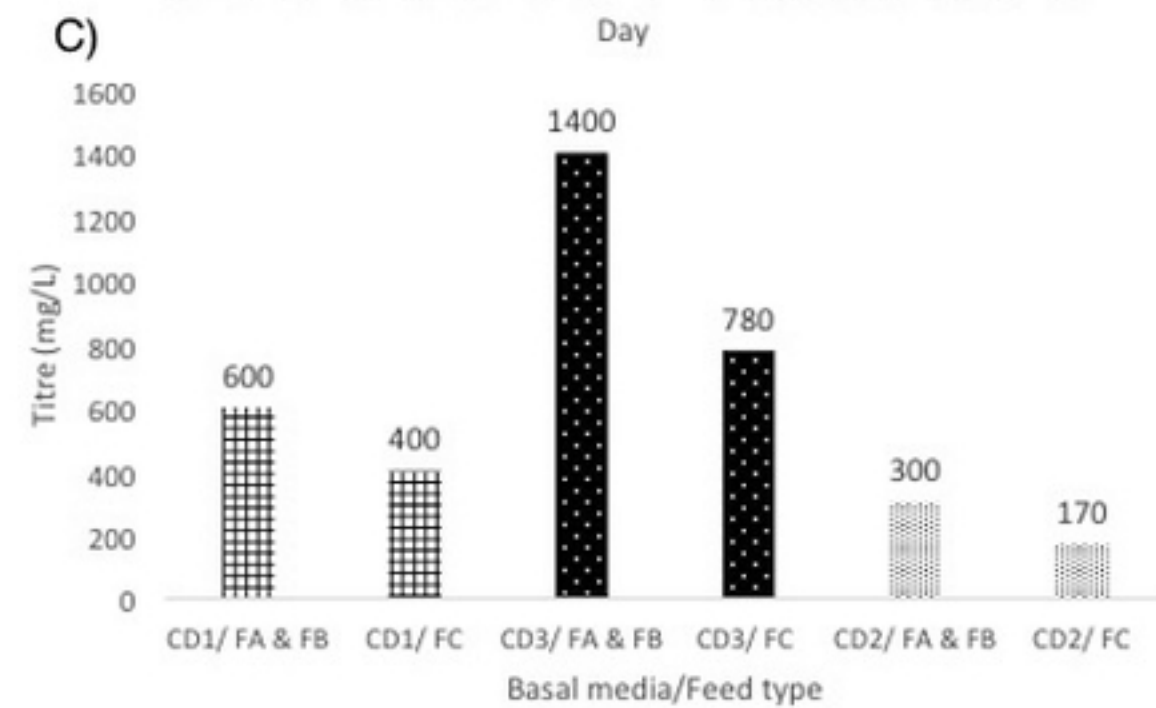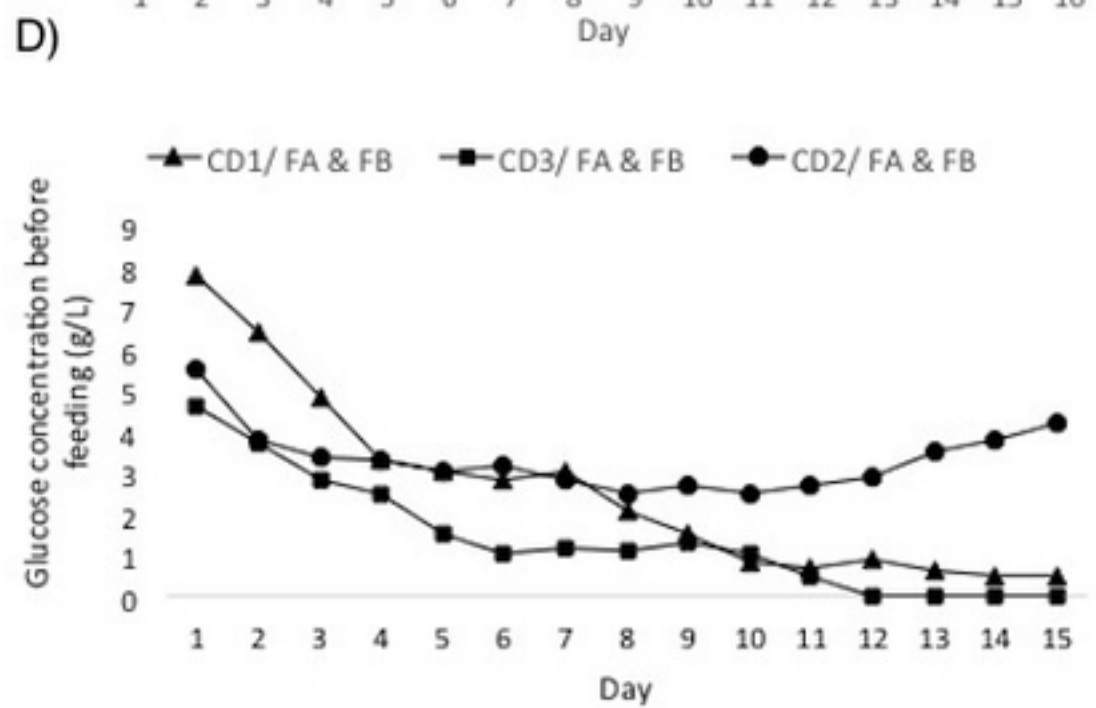

Figure

Contour Plot of Titre (mg/L) vs Feed percent (%), Glc set point (g/L)

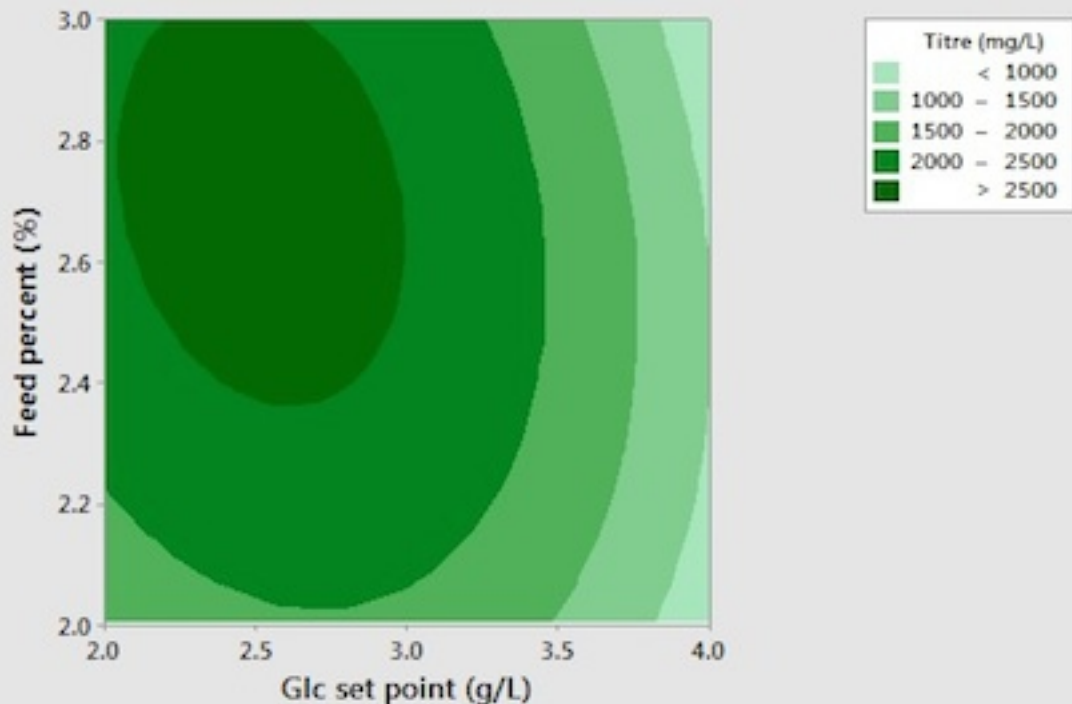

Figure

Titre and galactose content of proteins in different concentrations of UMG

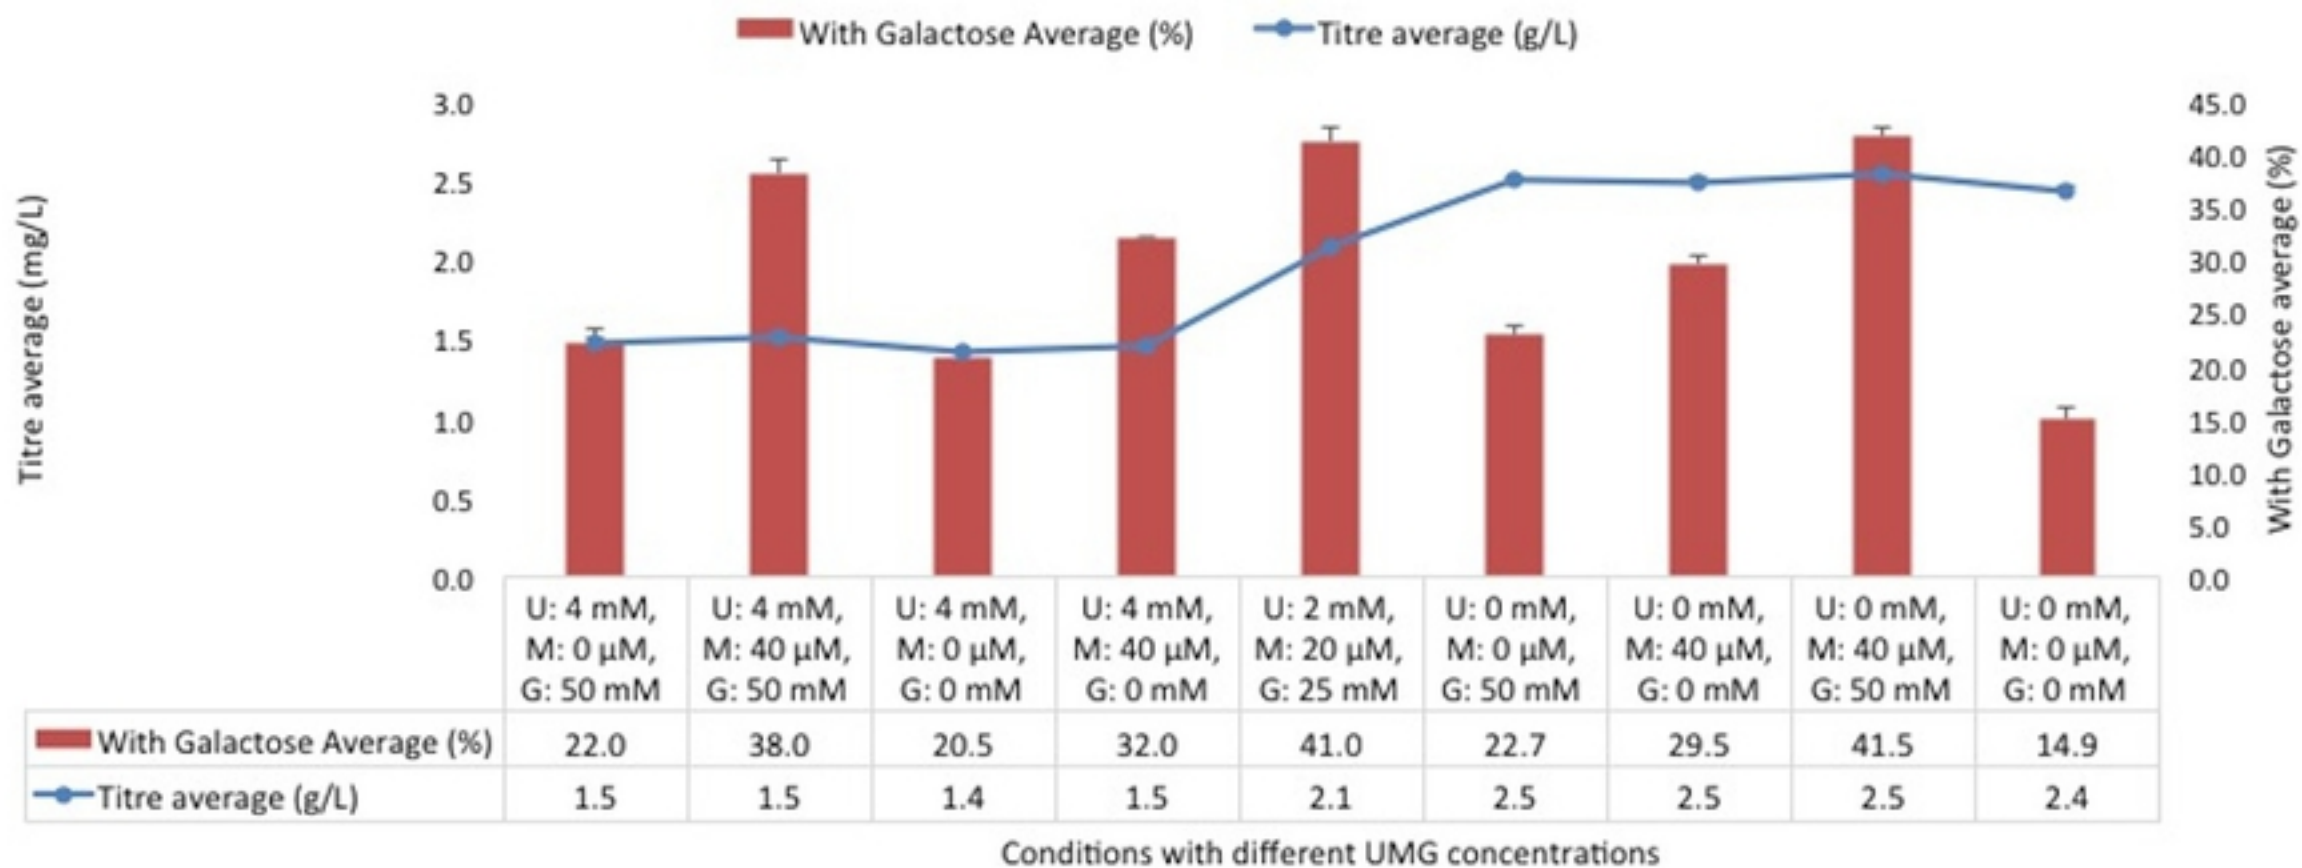

Figure

# Main Effects Plot for Titre (g/L)

## Means

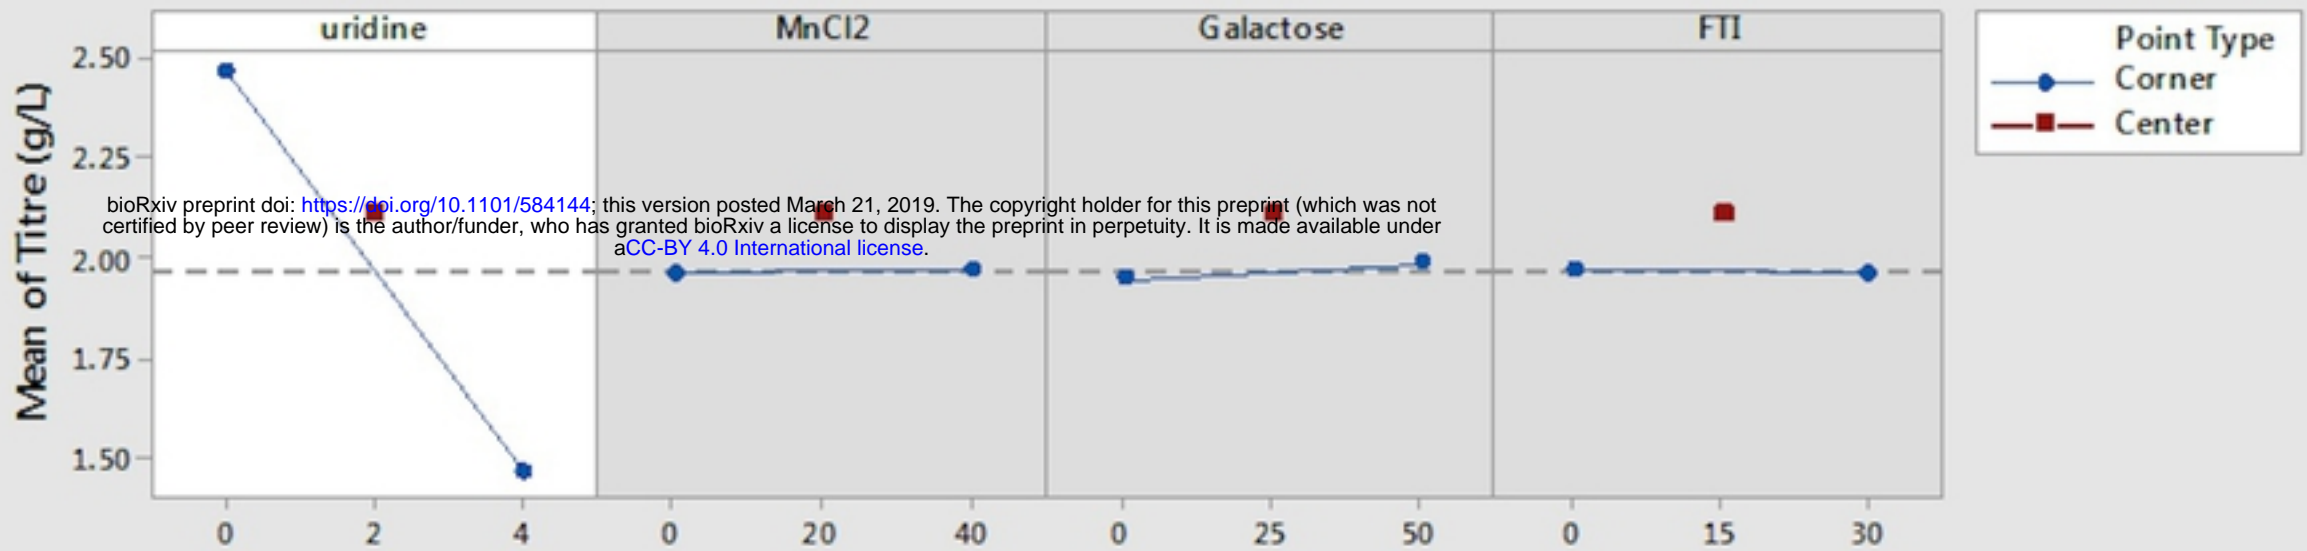

# Main Effects Plot for With Galactose %

## Fitted Means

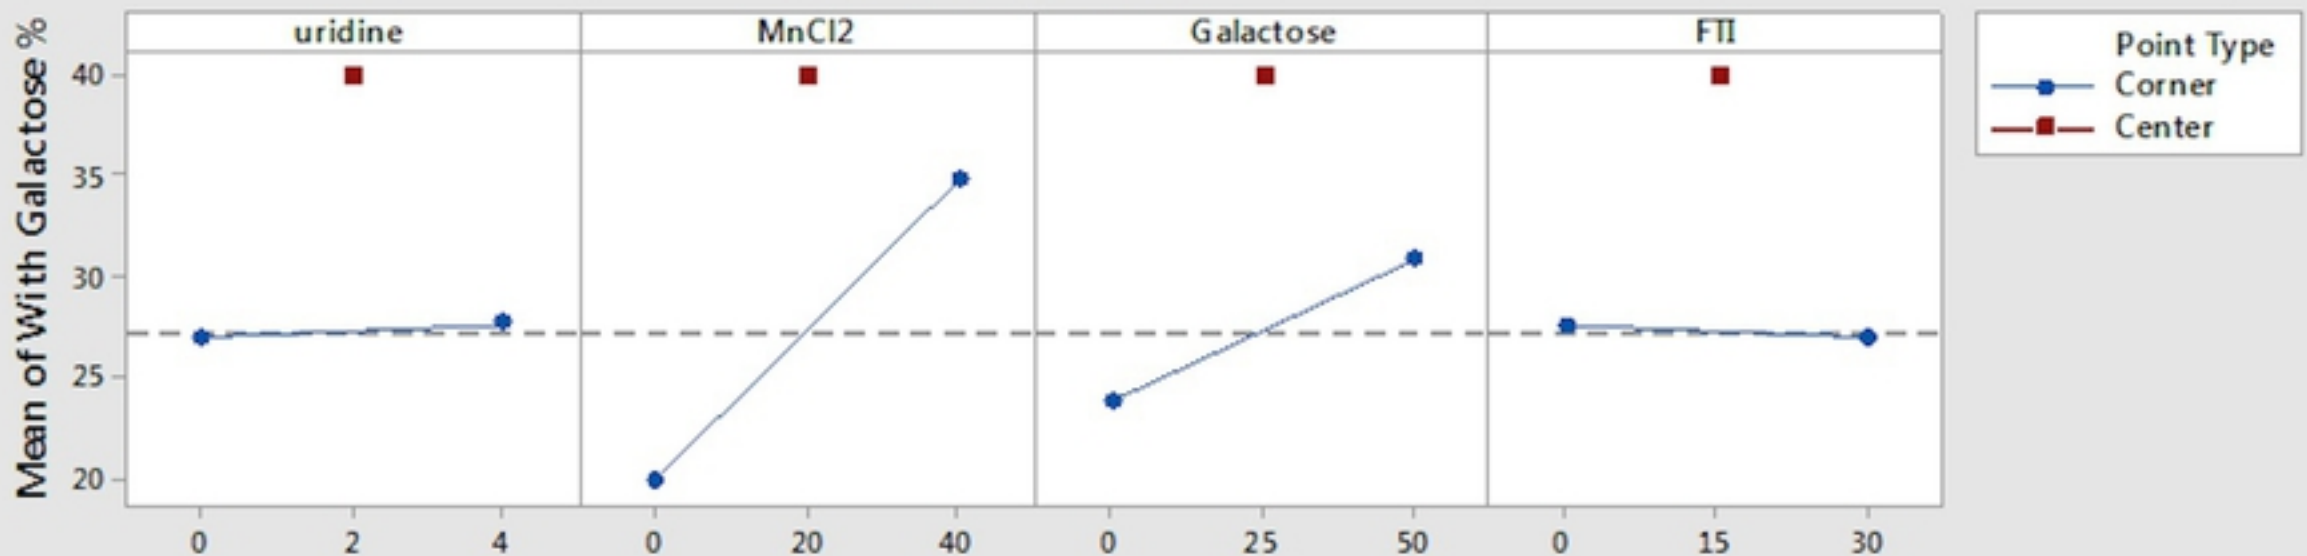

# Main Effects Plot for W/O Fucose %

## Fitted Means

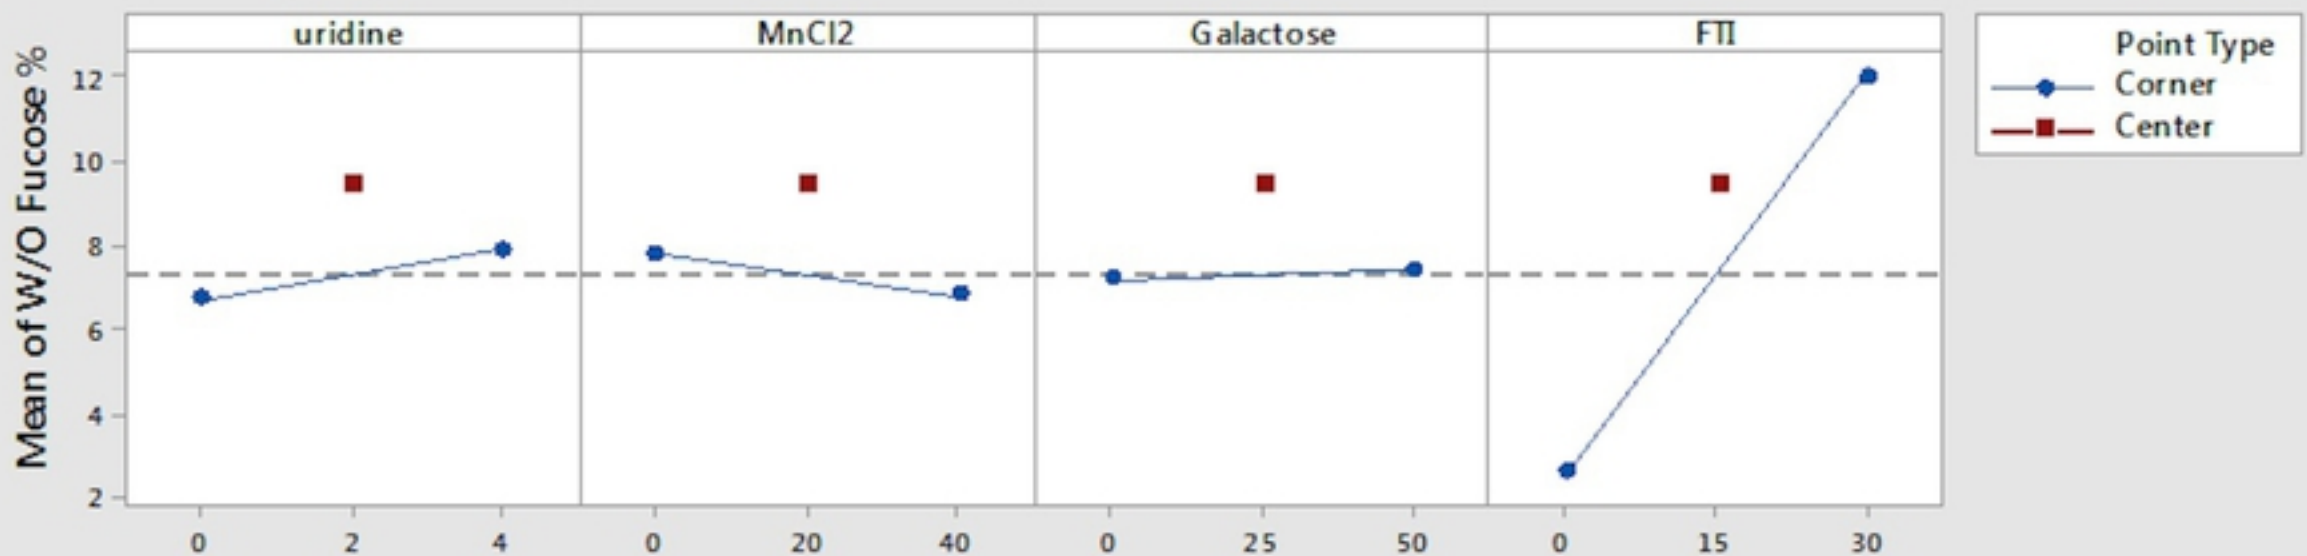

Source: https://www.biorxiv.org/content/10.1101/584144v1.full.pdf
